# Supplementary material
Source: PubMed Central journal article supplement (PMC6249042)

Supplemental Figure S1

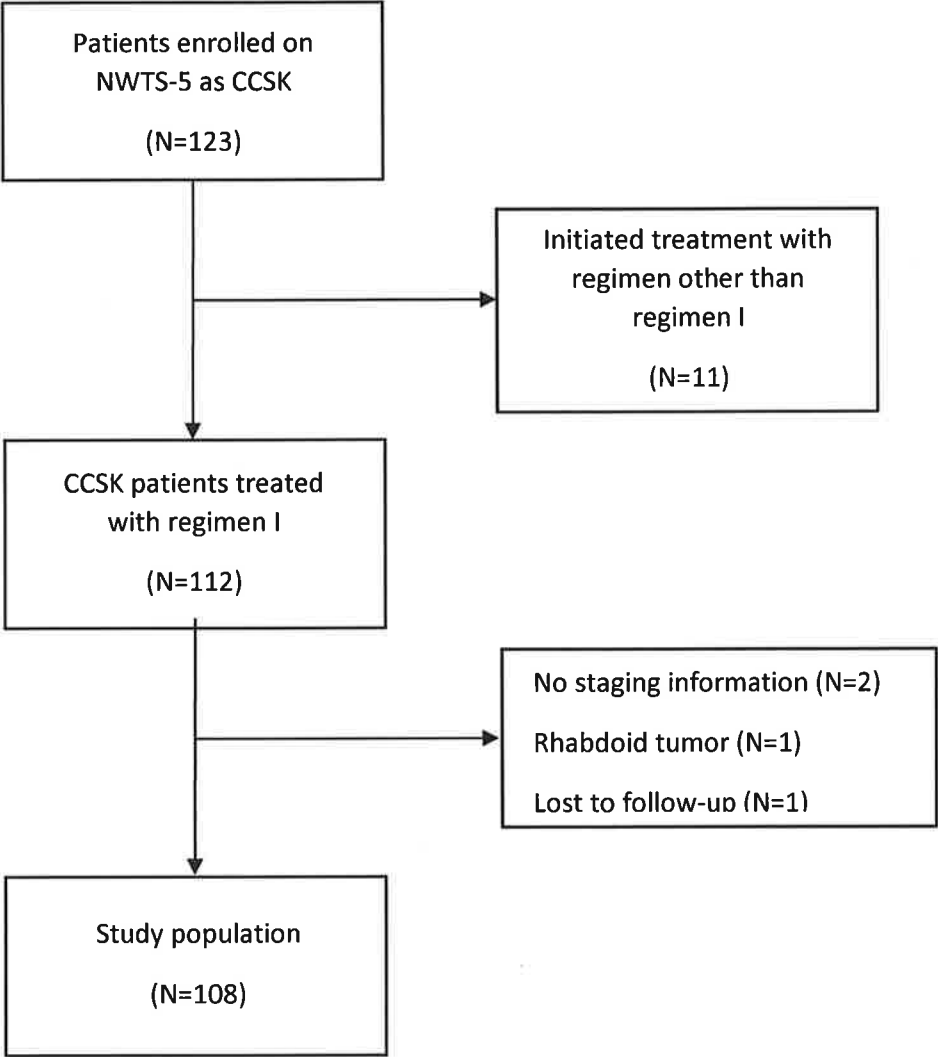

Supplement: NIHMS986830-supplement-Supp_figS1.pdf [file NIHMS986830-supplement-Supp_figS1.pdf]
